# Supplementary material for: Genomic analysis of Ugandan and Rwandan chicken ecotypes using a 600 k genotyping array
Source: PubMed Central journal article supplement (PMC4882793; doi:10.1186/s12864-016-2711-5), 2016-05-26

Single SNP Fst- Chromosome 18

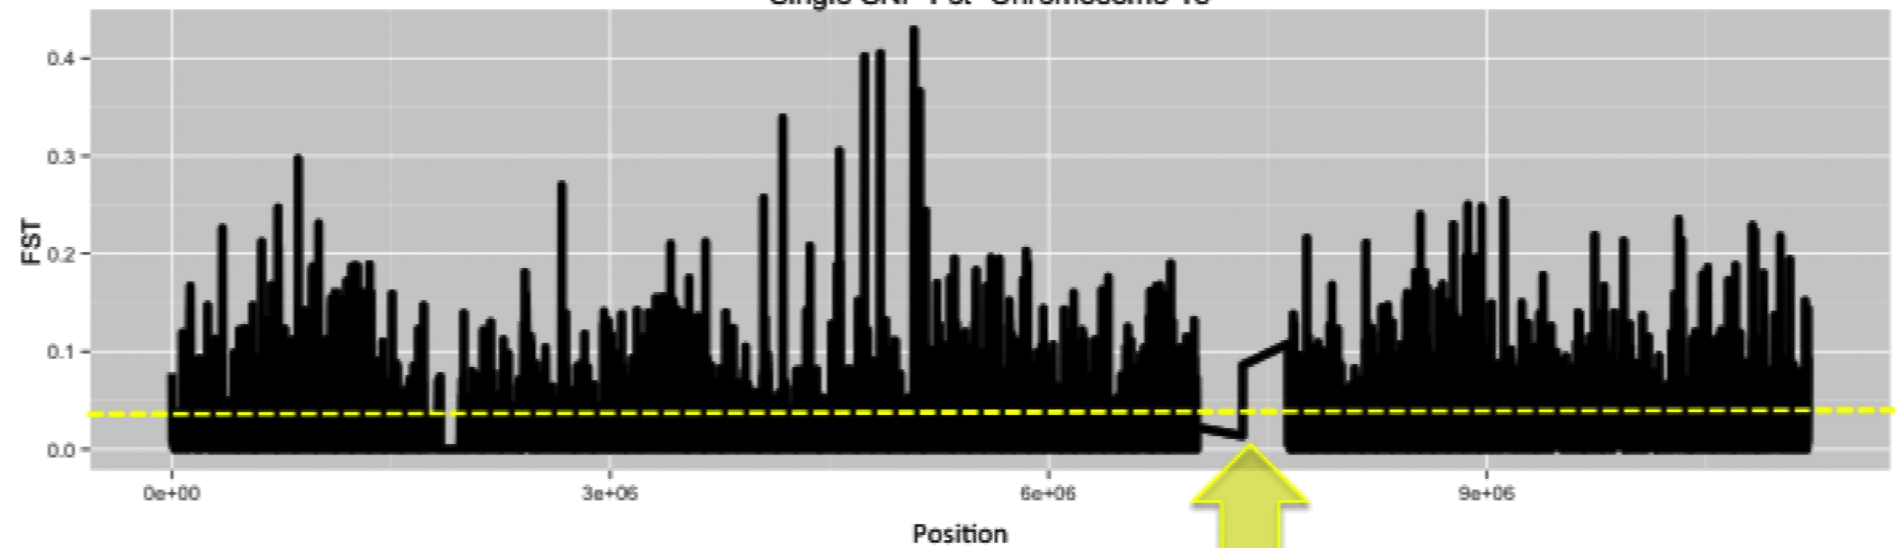

7.5e+06 - 7.7e+06Mb  
Protein kinase C, Alpha

10kb non-overlapping mean Fst windows- Chromosome 18

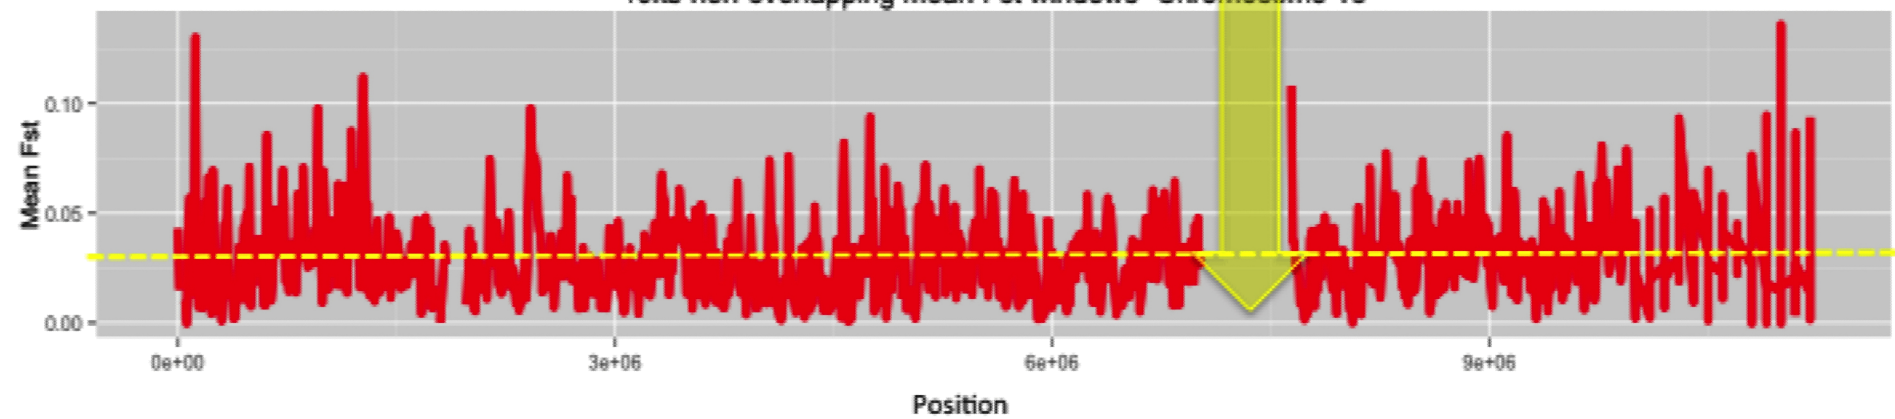

Supplement: 12864_2016_2711_MOESM4_ESM.pdf [file 12864_2016_2711_MOESM4_ESM.pdf]
