# Supplementary material for: Genomic analysis of Ugandan and Rwandan chicken ecotypes using a 600 k genotyping array
Source: PubMed Central journal article supplement (PMC4882793; doi:10.1186/s12864-016-2711-5), 2016-05-26

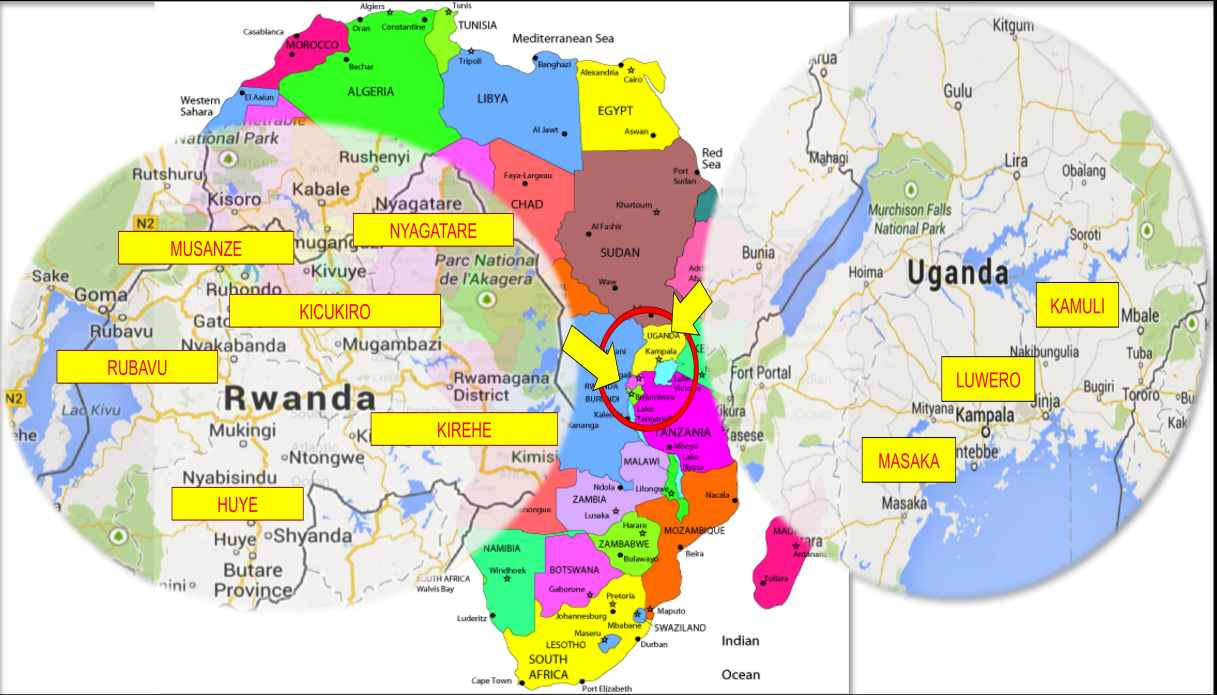

MUSANZE

NYAGATARE

KICUKIRO

RUBAVU

HUYE

KIREHE

KAMULI

LUWERO

MASAKA

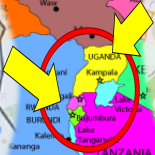

Supplement: 12864_2016_2711_MOESM5_ESM.pdf [file 12864_2016_2711_MOESM5_ESM.pdf]
